# Supplementary material
Source: publisher site journal article supplement (https://www.spandidos-publications.com/2572/downloadSupplementary)
Supplement: Supplementary file 1 [file downloadSupplementary]

Table SI. Treatments received for the initial tumor by patients in the irradiated area cohort.

| Characteristics                                                   | Data            |
|-------------------------------------------------------------------|-----------------|
| Surgery                                                           | 28 (56.0)       |
| Tumor surgery                                                     | 27 (96.4)       |
| Neck dissection                                                   | 27 (96.4)       |
| Ipsilateral                                                       | 10 (37.0)       |
| Bilateral                                                         | 16 (59.3)       |
| Unknown                                                           | 1 (3.7)         |
| Surgery T/N + RT                                                  | 22 (44.0)       |
| Type of RT                                                        |                 |
| 3D                                                                | 13 (59.1)       |
| IMRT                                                              | 9 (40.9)        |
| Dose on tumor site recurrence (T and/or N) (Gy)                   | 55.0; 56.3±8.8  |
| Number of fractions                                               | 27.0; 28.1±4.5  |
| Overall treatment time (days)                                     | 37.5; 55.8±86.6 |
| Mean dose on tumor site recurrence (T and/or N) <sup>a</sup> (Gy) | 50.0; 53.8±13.0 |
| Surgery T/N + RTCT                                                | 6 (12.0)        |
| RT                                                                |                 |
| Type of RT                                                        |                 |
| 3D                                                                | 2 (33.3)        |
| IMRT                                                              | 4 (66.7)        |
| Dose on tumor site recurrence (T and/or N) (Gy)                   | 66.0; 63.6±7.0  |
| Number of fractions                                               | 33.0; 32.2±4.6  |
| Overall treatment time (days)                                     | 44.0; 45.2±9.9  |
| Mean dose on tumor site recurrence (T and/or N) <sup>a</sup> (Gy) | 64.6; 60.3±7.9  |
| CT                                                                |                 |
| Cisplatin Q3w                                                     | 6 (100)         |
| Duration of CT (days)                                             | 32.5; 32.5±11.9 |
| Number of cycles                                                  |                 |
| 2                                                                 | 3 (50)          |
| 3                                                                 | 3 (50)          |
| Definitive RTCT <sup>b</sup>                                      | 10 (20.0)       |
| RT                                                                |                 |
| Type of RT                                                        |                 |
| 3D                                                                | 3 (30.0)        |
| IMRT                                                              | 7 (70.0)        |
| Dose on tumor site recurrence (T and/or N) (Gy)                   | 70.0; 67.5±6.3  |
| Number of fractions                                               | 34.0; 33.1±3.1  |
| Overall treatment time (days)                                     | 51.5; 49.0±16.1 |
| Mean dose on tumor site recurrence (T and/or N) <sup>a</sup> (Gy) | 70.0; 67.5±6.3  |
| CT                                                                |                 |
| Type of CT                                                        |                 |
| Cisplatin Q3w                                                     | 2 (20.0)        |
| Carboplatin 5-FU                                                  | 1 (10.0)        |
| Cetuximab                                                         | 4 (40.0)        |
| Other                                                             | 3 (30.0)        |
| Duration of CT (days)                                             | 43.5; 45.5±11.6 |
| Number of cycles                                                  | 5.0; 5.2±2.6    |
| RT only                                                           | 5 (10.0)        |
| Type of RT                                                        |                 |
| 3D                                                                | 4 (80.0)        |
| IMRT                                                              | 1 (20.0)        |
| Dose on tumor site recurrence (T and/or N)(Gy)                    | 50.0; 57.2±10.0 |
| Number of fractions                                               | 25.0; 28.6±5.0  |
| Overall treatment time (days)                                     | 35.0; 37.0±4.5  |

Table SI. Continued.

| Characteristics                                                   | Data            |
|-------------------------------------------------------------------|-----------------|
| Mean dose on tumor site recurrence (T and/or N) <sup>a</sup> (Gy) | 50.0; 57.2±10.0 |
| Induction chemotherapy + RTCT                                     | 7 (14.0)        |
| TPF                                                               | 7 (100)         |
| Number of cycles of TPF                                           | 50.0; 57.2±10.0 |

Data are expressed as frequency and percentage [n, (%)] or as median; mean ± standard deviation. CT, chemotherapy; Gy, Gray; IMRT, intensity-modulated radiation therapy; Q3w, every three weeks; RT, radiotherapy; RTCT, chemoradiotherapy; T/N Tumor/Node; TPF, docetaxel, cisplatin and fluorouracil; 3D, three-dimensional; 5-FU, 5-fluorouracil. <sup>a</sup>Comprising tumor progression. <sup>b</sup>Comprising cetuximab.

Table SII. Prognostic factors of PFS for the irradiated area cohort in univariate and multivariate analyses.

| Characteristics                                        | Univariate                    |         | Multivariate     |         |
|--------------------------------------------------------|-------------------------------|---------|------------------|---------|
|                                                        | HR (95% CI)                   | P-value | HR (95% CI)      | P-value |
| Age >60 years                                          | 0.87 (0.43-1.75)              | 0.699   |                  |         |
| Sex, male                                              | 1.24 (0.58-2.63)              | 0.581   |                  |         |
| Smoking                                                |                               | 0.405   |                  |         |
| Current smoker                                         | 1                             |         |                  |         |
| Former smoker                                          | 0.80 (0.40-1.62)              |         |                  |         |
| Never smoker                                           | 1.67 (0.54-5.20)              |         |                  |         |
| Alcohol                                                | 0.74 (0.37-1.47)              | 0.387   |                  |         |
| Tumor location hypopharynx                             | 1.03 (0.37-2.91)              | 0.953   |                  |         |
| Oropharynx p16 <sup>-</sup>                            | 0.81 (0.18-3.71)              | 0.785   |                  |         |
| Tumor well differentiated                              | 0.95 (0.49-1.83)              | 0.885   |                  |         |
| pT3-pT4                                                | 1.32 (0.71-2.48)              | 0.379   |                  |         |
| pN3-pN4                                                | 0.84 (0.40-1.78)              | 0.653   |                  |         |
| AJCC disease stage (8th edition)                       |                               | 0.730   |                  |         |
| I/II                                                   | 1                             |         |                  |         |
| III                                                    | 1.38 (0.62-3.06)              |         |                  |         |
| IV                                                     | 1.13 (0.54-2.35)              |         |                  |         |
| Smoking history (pack*year) ≥40                        | 0.71 (0.37-1.33)              | 0.281   |                  |         |
| Former drinker                                         | 0.59 (0.23-1.55)              | 0.289   |                  |         |
| Positive resection margins (R1 or R2)                  | 1.12 (0.60-2.07)              | 0.729   |                  |         |
| Lymphovascular invasion                                | 1.33 (0.62-2.85)              | 0.471   |                  |         |
| Perineural invasion                                    | 1.42 (0.60-3.33)              | 0.425   |                  |         |
| Number of lymphadenopathies >1                         | 0.70 (0.31-1.55)              | 0.3759  |                  |         |
| Number of nodes removed ≥30                            | 0.22 (0.03-1.68)              | 0.145   |                  |         |
| Extranodal spread                                      | 1.85 (0.38-9.03) <sup>1</sup> | 0.447   |                  |         |
| P16 negative (<70%)                                    | 0.41 (0.12-1.40)              | 0.156   |                  |         |
| TPS ≥1%                                                | 0.92 (0.49-1.73)              | 0.799   |                  |         |
| PD-L1 IC Intratumoral low expression                   | 0.84 (0.45-1.56)              | 0.584   |                  |         |
| PD-L1 IC Stromal low expression                        | 0.87 (0.46-1.64)              | 0.668   |                  |         |
| TPS <1% and PD-L1 IC Intratumoral = 0                  | 0.69 (0.35-1.37)              | 0.291   |                  |         |
| CD3 Intratumoral low counts                            | 1.31 (0.68-2.50)              | 0.420   |                  |         |
| CD3 Stromal low counts                                 | 0.98 (0.51-1.90)              | 0.957   |                  |         |
| CD3 Intratumoral low counts and CD3 stromal low counts | 1.22 (0.63-2.35)              | 0.559   |                  |         |
| CD8 Intratumoral low counts                            | 1.25 (0.67-2.33)              | 0.487   |                  |         |
| CD8 Stromal low counts                                 | 0.90 (0.48-1.68)              | 0.730   |                  |         |
| CD8 Intratumoral low counts AND CD8 stromal low counts | 1.30 (0.67-2.53)              | 0.434   |                  |         |
| Treatment of the initial tumor                         |                               | 0.849   |                  |         |
| Surgery T/N + RT                                       | 0.62 (0.24-1.60)              |         |                  |         |
| Surgery T/N + RTCT                                     | 1                             |         |                  |         |
| Definitive RTCT                                        | 0.55 (0.19-1.62)              |         |                  |         |
| RT only                                                | 0.65 (0.18-1.62)              |         |                  |         |
| Induction chemotherapy + RTCT                          | 0.57 (0.16-1.62)              |         |                  |         |
| Surgery T/N of the initial tumor                       | 1.19 (0.63-2.22)              | 0.589   |                  |         |
| Type of RT received for the initial tumor <sup>a</sup> |                               | 0.058   |                  | 0.002   |
| IMRT vs. 3D                                            | 1.89 (0.97-3.66)              |         | 3.30 (1.53-7.14) |         |
| Dose on tumor site recurrence (Gy) <sup>a</sup>        | 0.54 (0.28-1.07)              | 0.076   | 0.31 (0.14-0.67) | 0.003   |
| Mean dose on tumor site recurrence (Gy) <sup>a</sup>   | 0.51 (0.26-1.02)              | 0.057   |                  |         |
| Overall treatment time (days) >6 weeks <sup>a</sup>    | 1.42 (0.74-2.72)              | 0.295   |                  |         |
| Locoregional recurrence ≤6 months <sup>b</sup>         | 1.18 (0.48-2.94)              | 0.131   |                  |         |

HR, hazard ratio; 95% CI, 95% confidence interval; AJCC, American Joint Committee on Cancer; CT, chemotherapy; Gy, Gray; IC, immune cells; IMRT, intensity-modulated radiation therapy; PD-L1, programmed death-ligand 1; RT, radiotherapy; RTCT, chemoradiotherapy; TCs, tumor cells; TILs, tumor-infiltrating lymphocytes; TPS, tumor proportion score; Tum, tumoral; T/N Tumor/Node; Stro, stromal; WHO, World Health Organization; 3D, three-dimensional. For CD3<sup>+</sup> and CD8<sup>+</sup> TIL counts, values were dichotomized (low/high) according to the median cell number calculated from all samples and considered high if >40 CD3<sup>+</sup> cells and >30 CD8<sup>+</sup> cells were observed in intratumoral regions and if >160 CD3<sup>+</sup> cells and >90 CD8<sup>+</sup> cells were observed in stromal regions. Expression of PD-L1 by tumor cells was considered positive if TPS ≥1%. The expression of PD-L1 by immune cells was considered high with a score of 1-2 in intratumoral components and 2-5 in stromal components. <sup>a</sup>Computed on the 43 patients with radiotherapy (T and/or N). <sup>b</sup>Calculated for the 29 patients that had locoregional recurrence.
